# Supplementary material
Source: Springer Nature journal article supplement (https://www.springermedizin.de/resource/supplementary/13053_2013_455_MOESM3_ESM.pdf/9673890)
Supplement: MOESM3 [file 9673890]

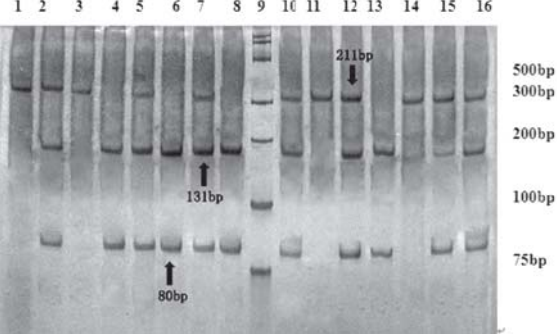

**Lane 1, 3, 11, 14 : Homozygous A/A genotype**

**Lane 4, 6, 8, 13 : Homozygous G/G genotype**

**Lane 9 : 75bp DNA Fragment Marker**

**Lane 2, 5, 7, 10, 12, 15, 16 : Heterozygous A/G genotype**
